# Supplementary material for: Hydrocarbon-Degrading Bacteria Found Tightly Associated with the 50–70 μm Cell-Size Population of Eukaryotic Phytoplankton in Surface Waters of a Northeast Atlantic Region
Source: MDPI journal article supplement (doi:10.3390/microorganisms8121955), 2020-12-09
Supplement: s1 [file s1]

**Supplementary table 1.** Probes used and their purpose for fluorescence *in situ* hybridisation (FISH) in the field sample treatments (A, B, C and D) and for the *Marinobacter algicola* control sample (treatment E).

| Treatment | Hybridization and probe selection                              | Replicates | Purpose                               |
|-----------|----------------------------------------------------------------|------------|---------------------------------------|
| A         | MRB625+Cy3; HAL625c                                            | 3          | Experimental sample                   |
| B         | MRB625+Cy3; HAL625c;<br>enriched with fixed <i>M. algicola</i> | 3          | Positive control                      |
| C         | NON338+Cy3                                                     | 3          | Nonspecific binding<br>quantification |
| D         | probe absent                                                   | 3          | Autofluorescence<br>quantification    |
| E         | <i>M. algicola</i> PFA-fixed culture<br>MRB625+Cy3; HAL625c    | 1          | Validation of<br>MRB625 probe         |
